# Supplementary material for: Asc1, homolog of human RACK1, prevents frameshifting in yeast by ribosomes stalled at CGA codon repeats
Source: PubMed Central journal article supplement — RNA. 2015 May;21(5):935–45. doi: 10.1261/rna.049080.114 (PMC4408800; doi:10.1261/rna.049080.114), 2015-05
Supplement: supp_049080.114_SuppTables.pdf [file supp_049080.114_SuppTables.pdf]

**Supplemental Table 1: Yeast Strains employed in this work**

| <b>Yeast Strain</b> | <b>Genotype</b>                                          | <b>Source</b>          |
|---------------------|----------------------------------------------------------|------------------------|
| BY4741              | <i>MATa his3Δ1,leu2Δ0,met15Δ0,ura3Δ0</i>                 |                        |
| AW638               | BY4741, <i>ltn1-Δ::ble<sup>R</sup></i>                   | (Letzring et al. 2013) |
| AW710               | BY4741, <i>rpl1b-Δ::ble<sup>R</sup></i>                  | (Letzring et al. 2013) |
| AW714               | BY4741, <i>asc1-Δ::kanMX</i>                             | (Letzring et al. 2013) |
| AW752               | BY4741, <i>hel2-Δ::kanMX</i>                             | (Letzring et al. 2013) |
| AW765               | BY4741,[hc, <i>URA3 ASC1</i> ]                           | This Study             |
| AW768               | BY4741, <i>asc1-Δ::HIS5 S.p.</i> [hc, <i>URA3 ASC1</i> ] | This Study             |
| AW824               | BY4741, <i>dom34-Δ::ble<sup>R</sup></i>                  | This Study             |
| AW828               | BY4741, <i>hbs1-Δ::ble<sup>R</sup></i>                   | This Study             |
| AW850               | AW765, <i>nmd2-Δ::kanMX</i>                              | This Study             |
| AW854               | AW765, <i>nam7-Δ::kanMX</i>                              | This Study             |
| AW858               | AW768, <i>nmd2-Δ::kanMX</i>                              | This Study             |
| AW890               | BY4741, <i>scp160-Δ::kanMX</i>                           | This Study             |
| YSJ004              | AW765, <i>gcn4-Δ::ble<sup>R</sup></i>                    | This Study             |
| YSJ0012             | AW768, <i>gcn4-Δ::ble<sup>R</sup></i>                    | This Study             |

**Supplemental Table 2: Plasmids employed in this work**

| <b>Plasmid Name</b> | <b>Description</b>                                                 | <b>Source</b>            |
|---------------------|--------------------------------------------------------------------|--------------------------|
| pDL202              | 2- $\mu$ <i>URA3 p<sub>PGK1</sub>-Fluc-Rluc</i>                    | (Letzring et al. 2010)   |
| pJE1012a            | 2- $\mu$ <i>URA3 GLN4</i> (1-187)                                  | (Grant et al. 2012)      |
| pEKD1024            | int, <i>MET15</i> , GFP-RFP reporter,<br>no insert upstream of GFP | (Dean and Grayhack 2012) |
| pAVA0577            | 2- $\mu$ <i>LEU2</i> vector                                        | (Alexandrov et al. 2006) |
| pEAW012             | int <i>P<sub>GAL 1,10</sub> Rluc-GFP</i> , RFP, <i>MET15</i>       | (Letzring et al. 2013)   |
| pDL867              | 2- $\mu$ <i>LEU2 tR(ACG)D</i> in pAVA0577                          | (Letzring et al. 2010)   |
| pDL869              | 2- $\mu$ <i>LEU2 tR(UCU)K-U36G</i> in pAVA0577                     | (Letzring et al. 2010)   |
| pEAW0024            | (CGA) <sub>4</sub> insert in pEAW012                               | (Letzring et al. 2013)   |
| pEAW0026            | (AGA) <sub>4</sub> insert in pEAW012                               | (Letzring et al. 2013)   |
| pECB0498            | (CGA) <sub>4</sub> +1 (A)*<br>insert in pEAW012                    | This Study               |
| pECB0502            | (CGA) <sub>4</sub> -1 (AA)*<br>insert in pEAW012                   | This Study               |
| pECB0490            | (AGA) <sub>4</sub> +1 (A)*<br>insert in pEAW012                    | This Study               |
| pECB0494            | (AGA) <sub>4</sub> -1 (AA)*<br>insert in pEAW012                   | This Study               |
| pECB194             | 2- $\mu$ <i>URA3</i> vector [derived from pAVA0577]                | (Alexandrov et al. 2006) |
| pEAW076             | 2- $\mu$ <i>URA3 ASC1</i> in pECB194                               | This Study               |
| pEAW141             | 2- $\mu$ <i>LEU2 ASC1</i> No Intron in pAVA0577                    | This Study               |
| pEAW0174            | (AGA) <sub>6</sub> insert in pEAW012                               | This Study               |
| pEAW0177            | (AGA) <sub>6</sub> +1 (A)* insert in pEAW012                       | This Study               |
| pEAW0180            | (CGA) <sub>2</sub> (AGA) <sub>4</sub> insert in pEAW012            | This Study               |
| pEAW0183            | (CGA) <sub>2</sub> (AGA) <sub>4</sub> +1(A)* insert in pEAW012     | This Study               |
| pEAW0186            | (CGA) <sub>3</sub> (AGA) <sub>3</sub> insert in pEAW012            | This Study               |
| pEAW0189            | (CGA) <sub>3</sub> (AGA) <sub>3</sub> +1(A)* insert in pEAW012     | This Study               |
| pEAW0192            | (CGA) <sub>4</sub> (AGA) <sub>2</sub> insert in pEAW012            | This Study               |
| pEAW0195            | (CGA) <sub>4</sub> (AGA) <sub>2</sub> +1(A)* insert in pEAW012     | This Study               |
| pEAW0198            | (CGA) <sub>5</sub> (AGA) insert in pEAW012                         | This Study               |
| pEAW0201            | (CGA) <sub>5</sub> (AGA)+1(A)* insert in pEAW012                   | This Study               |
| pEAW0204            | (CGA) <sub>6</sub> insert in pEAW012                               | This Study               |
| pEAW0207            | (CGA) <sub>6</sub> +1(A) insert in pEAW012                         | This Study               |
| pEJW003             | <i>Gln4</i> (a.a.1-5)-(AGA) <sub>4</sub> -GFP in EKD1024           | This Study               |
| pEJW007             | <i>Gln4</i> (a.a.1-5)-(CGA) <sub>4</sub> -GFP in EKD1024           | This Study               |
| pEJW020             | <i>Gln4</i> (a.a.1-15)-(AGA) <sub>4</sub> -GFP in EKD1024          | This Study               |
| pEJW023             | <i>Gln4</i> (a.a.1-15)-(CGA) <sub>4</sub> -GFP in EKD1024          | This Study               |
| pEJW027             | <i>Gln4</i> (a.a.1-25)-(CGA) <sub>4</sub> -GFP in EKD1024          | This Study               |
| pEJW031             | <i>Gln4</i> (a.a.1-25)-(CGA) <sub>4</sub> -GFP in EKD1024          | This Study               |
| pEJW035             | <i>Gln4</i> (a.a.1-44)-(AGA) <sub>4</sub> -GFP in EKD1024          | This Study               |
| pEJW039             | <i>Gln4</i> (a.a.1-44)-(CGA) <sub>4</sub> -GFP in EKD1024          | This Study               |
| pEJW043             | <i>Gln4</i> (a.a.1-62)-(AGA) <sub>4</sub> -GFP in EKD1024          | This Study               |
| pEJW047             | <i>Gln4</i> (a.a.1-62)-(AGA) <sub>4</sub> -GFP in EKD1024          | This Study               |
| pEJW051             | <i>Gln4</i> (a.a.1-99)-(AGA) <sub>4</sub> -GFP in EKD1024          | This Study               |
| pEJW056             | <i>Gln4</i> (a.a.1-99)-(AGA) <sub>4</sub> -GFP in EKD1024          | This Study               |
| pEAW234             | <i>Gln4</i> (a.a.1-25)-(CGA) <sub>4</sub> +1 (A)* -GFP in EKD1024  | This Study               |
| pEAW236             | <i>Gln4</i> (a.a.1-25)-(AGA) <sub>4</sub> +1 (A)* -GFP in EKD1024  | This Study               |
| pEAW238             | <i>Gln4</i> (a.a.1-44)-(CGA) <sub>4</sub> +1 (A)* -GFP in EKD1024  | This Study               |
| pEAW240             | <i>Gln4</i> (a.a.1-44)-(AGA) <sub>4</sub> +1 (A)* -GFP in EKD1024  | This Study               |

|          |                                                                    |            |
|----------|--------------------------------------------------------------------|------------|
| pEAW242  | <i>Gln4</i> (a.a. 1-62)-(CGA) <sub>4</sub> +1 (A)* -GFP in EKD1024 | This Study |
| pEAW244  | <i>Gln4</i> (a.a. 1-62)-(AGA) <sub>4</sub> +1 (A)* -GFP in EKD1024 | This Study |
| pEAW246  | <i>Gln4</i> (a.a. 1-99)-(CGA) <sub>4</sub> +1 (A)* -GFP in EKD1024 | This Study |
| pEAW248  | <i>Gln4</i> (a.a. 1-99)-(AGA) <sub>4</sub> +1 (A)* GFP in EKD1024  | This Study |
| pEAW250  | <i>Gln4</i> (a.a. 1-5)-(AGA) <sub>4</sub> +1 (A)* GFP in EKD1024   | This Study |
| pEAW252  | <i>Gln4</i> (a.a. 1-5)-(CGA) <sub>4</sub> +1 (A)* GFP in EKD1024   | This Study |
| pEAW254  | <i>Gln4</i> (a.a. 1-15)-(AGA) <sub>4</sub> +1 (A)* GFP in EKD1024  | This Study |
| pEAW256  | <i>Gln4</i> (a.a. 1-15)-(CGA) <sub>4</sub> +1 (A)* GFP in EKD1024  | This Study |
| pEAW264  | (CGA) <sub>3</sub> +1 (A) insert in pEAW012                        | This Study |
| pEAW270  | (CGA) <sub>2</sub> AGA +1 (A) insert in pEAW012                    | This Study |
| pEAW275  | (AGA) <sub>3</sub> insert in pEAW012                               | This Study |
| pEAW276  | (AGA) <sub>3</sub> +1 (A) insert in pEAW012                        | This Study |
| pEAW277  | (CGA) <sub>3</sub> insert in pEAW012                               | This Study |
| pEAW282  | (CGA) <sub>2</sub> AGA insert in pEAW012                           | This Study |
| pEAW0320 | (AGA) <sub>4</sub> insert in pDL202                                | This Study |
| pEAW0322 | (CGA) <sub>4</sub> insert in pDL202                                | This Study |
| pEAW0324 | (CGA) <sub>4</sub> +1 (A) insert in pDL202                         | This Study |
| pEAW0326 | (AGA) <sub>4</sub> +1 (A) insert in pDL202                         | This Study |

\*Indicates the nucleotide(s) that were inserted directly after Arg codons to put GFP into either the +1 or -1 frame

**Supplemental Table S3: Oligonucleotides Employed in this work**

| Oligo ID | Description                                | Sequence (5'-3')                                              |
|----------|--------------------------------------------|---------------------------------------------------------------|
| OW125    | ASC1 delta phleo F (PCR deletion cassette) | ATAACACACTAAAGTAAATAAAGTGAAAAGCGGCCGCCAGCTGAA                 |
| OW126    | ASC1phelo Reverse (PCR deletion cassette)  | CATAAAAGAACAAATGAACTTTATACATATTCAAATAGGCCACTAGTGGATCTGAT      |
| OW016    | ASC1-482F                                  | CACGTATTTTGCTCGGTGTGATAT                                      |
| OW017    | ASC1-339R                                  | GAGACTGAATTTAATGAACTCCTTGC                                    |
| OW070    | ASC1-326+LIC F (Clone ASC1)                | GGGTCCTGGTTCGAGCCATCTGTAGC                                    |
| OW071    | ASC1+434+LIC R (Clone ASC1)                | CTTGTTCTGTGCTGTTACTCTATCTAC                                   |
| OW090    | RLUC-GFP Fusion F                          | CTAATTCATCAACCTTACGAGCAAGGATCTATGACTTCG                       |
| OW091    | RLUC-GFP Fusion R                          | TACCACTATTAATTAAGTTACTAGAGGTGACATTTGTTTCATTTTTGAGAACTC        |
| OW119    | ASC1-496P1 F (Clone ASC1 No Intron)        | GCATTATGAATTGGAACCACGTAT                                      |
| OW120    | ASC1-482+LIC (Clone ASC1 No Intron)        | GGGTCCTGGTTCGAGCATTATGAATTGGAACCACGTAT                        |
| OW121    | ASC1+537 Intron R (Clone ASC1 No Intron)   | CCTTAACCATTTTGTCGTTACCG                                       |
| OW122    | ASC1+810intron P3 F (Clone ASC1 No Intron) | AAAATGGTTAAGGCTTGGAACTTAAACCAATTC                             |
| OW123    | Asc1+445 P4 R (Clone ASC1 No Intron)       | CAATTGCTCTATCTACCTATGGAATG                                    |
| OW124    | ASC1 +445 P4 R+Lic (Clone ASC1 No Intron)  | CTTGTTCTGTGCTGTTACAATTGCTCTATCTACCTATGGAATG                   |
| OJYW001  | GLN4(a.a.1-5)(AGA)4-GFP F                  | AATTCATCAACCTTAAGAAAATGTCTTCTGTAGAAAGAAGAAGAAGA               |
| OJYW002  | GLN4(a.a.1-5)(AGA)4-GFP R                  | CTTCCAAACCACTGGTTCCTTCTTCTTCTTCTACAGAAGACAT                   |
| OJYW003  | GLN4(a.a.1-5)(CGA)4-GFP F                  | AATTCATCAACCTTAAGAAAATGTCTTCTGTAGAACGACGACG                   |
| OJYW004  | GLN4(a.a.1-5)(CGA)4-GFP R                  | CTTCCAAACCACTGGTTCGTCGTCGTCGTTCTACAGAAGACAT                   |
| OJYW008  | GLN4 (a.a.1-16) F                          | AATTCATCAACCTTAAGAAAATGTCTTCTGTAGAAAGAATTGACTCAGCTGTTTTACAG   |
| OJYW009  | GLN4(a.a.1-16) (AGA)4 R                    | CTTCCAAACCACTGGTTCCTTCTTCTTCTCCCAACCTGTGAAAACAGCTGAGTCAATTCTT |
| OJYW010  | GLN4(a.a.1-16) (CGA)4 R                    | CTTCCAAACCACTGGTTCGTCGTCGTCGCCAACCTGTGAAAACAGCTGAGTCAATTCTT   |
| OJYW011  | GLN4 (a.a. 1-(25, 44, 62, 99)) F           | AATTCATCAACCTTAAGAAAATGTCTTCTGTAGAAAGAATTGACTCAG              |
| OJYW012  | GLN4(a.a.1-25) (AGA)4 R                    | CTTCCAAACCACTGGTTCCTTCTTCTTCTGACAATCTCCTTCACCTTTTTATCTTC      |
| OJYW013  | GLN4(a.a.1-25) (CGA)4 R                    | CTTCCAAACCACTGGTTCGTCGTCGTCGGACAATCTCCTTCACCTTTTTATCTTC       |
| OJYW014  | GLN4(a.a.1-44) (AGA)4 R                    | CTTCCAAACCACTGGTTCCTTCTTCTTCTGTCCGAAGGAGTCTCCTTAATCA          |
| OJYW015  | GLN4(a.a.1-44) (CGA)4 R                    | CTTCCAAACCACTGGTTCGTCGTCGTCGGTCCGAAGGAGTCTCCTTAATCA           |
| OJYW016  | GLN4(a.a.1-62) (AGA)4 R                    | CTTCCAAACCACTGGTTCCTTCTTCTTCTGACAAAAGATGCCAGGTTGTGTA          |
| OJYW017  | GLN4(a.a.1-62) (CGA)4 R                    | CTTCCAAACCACTGGTTCGTCGTCGTCGGACAAAAGATGCCAGGTTGTGTA           |
| OJYW018  | GLN4(a.a.1-99) (AGA)4 R                    | CTTCCAAACCACTGGTTCCTTCTTCTTCTGCCATTAGCCTTTACATATTTAAATGC      |
| OJYW019  | GLN4(a.a.1-99) (CGA)4 R                    | CTTCCAAACCACTGGTTCGTCGTCGTCGGCCATTAGCCTTTACATATTTAAATGC       |
| OW206    | GLN4 (a.a.1-5)(AGA)4+1-GFP F               | AATTCATCAACCTTAAGAAAATGTCTTCTGTAGAAAGAAGAAGAAGAA              |
| OW207    | GLN4 (a.a.1-5)(AGA)4+1-GFP R               | CTTCCAAACCACTGGTTCCTTCTTCTTCTTCTACAGAAGACAT                   |



| Oligo ID | Description                     | Sequence (5'-3')                                              |
|----------|---------------------------------|---------------------------------------------------------------|
| OW191    | RLUC- (CGA)2(AGA)4+1-GFP [R]    | CTTCCAAACCACTTTCTTCTTCTCT                                     |
| OW192    | RLUC- (CGA)3(AGA)3-GFP [R]      | CTTCCAAACCACTTCTTCTTCTCG                                      |
| OW193    | RLUC-(CGA)3(AGA)3 +1-GFP [R]    | CTTCCAAACCACTTTCTTCTTCTCG                                     |
| OW198    | RLUC-(CGA)5(AGA)-GFP [R]        | CTTCCAAACCACTTCTTCGTCTGTCG                                    |
| OW199    | RLUC-(CGA)5(AGA) +1-GFP [R]     | CTTCCAAACCACTTTCTTCGTCTGTCG                                   |
| OW200    | RLUC- (AGA)6-GFP [R]            | CTTCCAAACCACTTCTTCTTCTTCT                                     |
| OW201    | RLUC- (AGA)6 +1-GFP [R]         | CTTCCAAACCACTTTCTTCTTCTTCT                                    |
| OW202    | RLUC-(CGA)4(AGA)2-GFP [R]       | CTTCCAAACCACTTCTTCTTCTGTCG                                    |
| OW203    | RLUC-(CGA)4(AGA)2+1-GFP [R]     | CTTCCAAACCACTTTCTTCTTCTGTCG                                   |
| OW204    | RLUC- (CGA)6-GFP [R]            | CTTCCAAACCACTTCGTCTGTCGTCG                                    |
| OW205    | RLUC-(CGA)6+1-GFP [R]           | CTTCCAAACCACTTTCTGTCGTCTGTCG                                  |
| OCB087   | PCR DOM34 deletion F            | GTACTGCGTGATGAAAGTGATACATACATTATTCAATATTCCAGCTGAAGCTTCGTACGC  |
| OCB088   | PCR DOM34 deletion R            | TAATTGCGGCTTCACATCTACTTGCTTATAGGGAAGAAGTGCATAGGCCACTAGTGGATC  |
| OCB089   | Extension PCR DOM34 deletion F  | AGCAGAGCTGAAAAAATTTTCTTTTTACCAAAAATCCGTAAGTGCATGAAAGTGTAC     |
| OCB090   | Extension PCR DOM34 deletion R  | ACGTGACTAACTAGAACCATTTTACAACAACCTCAATTAATTGCGGCTTCACATCTACTTG |
| OCB091   | PCR HBS1 deletion F             | GCCCATTAATGTGACTTGAATATACCACATGAAAGCTAACCAGCTGAAGCTTCGTACGC   |
| OCB092   | PCR HBS1 deletion R             | CAGAGGCAGGTATTCTTTTGTATTGTGCGCCCTTAACCTTGCATAGGCCACTAGTGGATC  |
| OCB093   | Extension PCR HBS1 deletion F   | TCGTATTCATATATTGATCACAATGCACGGAGACGCCATTAATGTGACTTGAATATACC   |
| OCB094   | Extension PCR HBS1 deletion R   | TTTTCAAACCTATTCAATAGTTTTTTAGATATATTCAGAGGCAGGTATTCTTTTGTATTG  |
| OW0162   | SCP160-276 F (PCR deletion)     | GACTTGCAACGGATAGTATATTTAC                                     |
| OW0163   | SCP160-357 F (confirm deletion) | GTGGGCTTGAAAAATTTTCGCTC                                       |
| OW0164   | SCP160 +182 R (PCR deletion)    | CTTCTCCATTTCTTATGTTTCGTG                                      |
| OW0242   | RLUC- (AGA)3+1-GFP [F]          | ACCTCTACTAACTTAAGAAGAAGAAA                                    |
| OW0259   | RLUC- (AGA)3+1-GFP [R]          | CTTCCAAACCACTTTCTTCTTCT                                       |
| OW0260   | RLUC- (AGA)3-GFP [R]            | CTTCCAAACCACTTCTTCTTCT                                        |
| OW0261   | RLUC- (AGA)6-GFP [F]            | ACCTCTACTAACTTAAGAAGAAGAA                                     |
| OW0270   | RLUC- (CGA)2AGA+1-GFP [R]       | CTTCCAAACCACTTTCTTCGTCTG                                      |
| OW0271   | RLUC- (CGA)2AGA+1-GFP [F]       | ACCTCTACTAACTTACGACGAAGAAA                                    |
| OW0248   | RLUC- (CGA)2AGA -GFP [F]        | ACCTCTACTAACTTACGACGAAGAA                                     |
| OW0249   | RLUC- (CGA)2AGA-GFP [R]         | CTTCCAAACCACTTCTTCGTCTG                                       |
| OW0257   | RLUC- (CGA)3 -GFP [R]           | CTTCCAAACCACTTCGTCTGTCG                                       |
| OW0258   | RLUC- (CGA)3-GFP [F]            | ACCTCTACTAACTTACGACGACGAA                                     |
| OW0282   | RLUC- (CGA)3+1 -GFP [R]         | CTTCCAAACCACTTTCTGTCGTCTG                                     |

| Oligo ID | Description                      | Sequence (5'-3')                |
|----------|----------------------------------|---------------------------------|
| OW0283   | RLUC- (CGA)3+1-GFP [F]           | ACCTCTACTAACTTACGACGACGAAA      |
| OW0165   | SCP160 +272 R (confirm deletion) | CCGCCTTATAACGAAGACTCTTT         |
| OW290    | Nam7- 446 F (confirm deletion)   | AAACATATGCATCTGGCGAACTC         |
| OW291    | Nam7-271 F (PCR deletion)        | CATCAGTTTTCCCTTTGCTTACTT        |
| OW292    | Nam7+ 277 R (PCR deletion)       | GCGCCGTAAAGAGTATTCATTAG         |
| OW293    | NAM7+ 324 R (confirm deletion)   | GCAAAAATGAAACCTCGCTAC           |
| OW294    | Nmd2-321 F (confirm deletion)    | GTTTCTATGATCACTACGGGATA         |
| OW295    | Nmd2-264 F (PCR deletion)        | CTTAGGGCATGAGGATGATATTAG        |
| OW296    | Nmd2+206 R (PCR deletion)        | AAACTACAGCGGTGGTAAAGAAG         |
| OW297    | Nmd2+278 R (confirm deletion)    | TGTTGTCAGTTTAAGCAAGGACC         |
| OW320    | RLUC-(CGA)4-FLUC F               | TCGACGCGACGACGACGAG             |
| OW321    | RLUC-(CGA)4-FLUC R               | GATCCTCGTCGTCGTCGCG             |
| OW322    | RLUC-(CGA)4+1 (A) -FLUC F        | TCGACGCGACGACGACGAAG            |
| OW323    | RLUC-(CGA)4+1 (A) -FLUC R        | GATCCTTCGTCGTCGTCGCG            |
| OW326    | RLUC-(AGA)4-FLUC F               | TCGACGAGAAGAAGAAGAG             |
| OW327    | RLUC-(AGA)4-FLUC R               | GATCCTCTTCTTCTTCTCG             |
| OW328    | RLUC-(AGA)4+1 (A) -FLUC F        | TCGACGAGAAGAAGAAGAAG            |
| OW329    | RLUC-(AGA)4+1 (A) -FLUC R        | GATCCTTCTTCTTCTTCTCG            |
| OCB721   | RT-QPCR GFP Internal F           | TATACATCACGGCAGACAAACA          |
| OCB722   | RT-QPCR GFP Internal R           | GCTAGTTGAACGGAACCATCT           |
| OACT1-F  | Actin Primer F                   | ACG TTC CAG CCT TCT ACG TTT CCA |
| OACT1-R  | ACT 1 Primer R                   | ACG TGA GTA ACA CCA TCA CCG GAA |
